# Supplementary material for: Collaborating with front-line healthcare professionals: the clinical and cost effectiveness of a theory based approach to the implementation of a national guideline
Source: BMC Health Serv Res. 2014 Dec 21;14:648. doi: 10.1186/s12913-014-0648-4 (PMC4301624; doi:10.1186/s12913-014-0648-4)
Supplement: Additional file 1: — Nasogastric tube audit tool example. Contents of audit tool used to assess notes of patients who were fed through a nasogastric tube. [file 12913_2014_648_MOESM1_ESM.pdf]

| Nasogastric tube audit                                                                                     |  |                                 |                                              |                   |                                                 |                                  |                      |                                 |       |
|------------------------------------------------------------------------------------------------------------|--|---------------------------------|----------------------------------------------|-------------------|-------------------------------------------------|----------------------------------|----------------------|---------------------------------|-------|
| NHS number: .....                                                                                          |  |                                 | Ward Location: .....                         |                   |                                                 | Date .....                       |                      |                                 |       |
| Patient age: .....                                                                                         |  |                                 | Name of staff carrying out assessment: ..... |                   |                                                 |                                  |                      |                                 |       |
| SECTION 1: Insertion                                                                                       |  |                                 |                                              |                   |                                                 |                                  |                      |                                 |       |
| 1) What was the relevant diagnosis? (circle <b>one</b> as appropriate)                                     |  |                                 |                                              |                   |                                                 |                                  |                      |                                 |       |
| Stroke                                                                                                     |  | Oropharyngeal cancers           |                                              | Motor disturbance |                                                 | Decreased GCS                    |                      | Other (specify): .....          |       |
| 2) What was the indication for the tube? (circle <b>one</b> as appropriate)                                |  |                                 |                                              |                   |                                                 |                                  |                      |                                 |       |
| Feeding only                                                                                               |  | Feeding and medication          |                                              | Medication        |                                                 | Decompression                    |                      | Other (specify): .....          |       |
| 3) Has the new care plan been used?                                                                        |  |                                 |                                              |                   |                                                 |                                  |                      | Yes                             | No    |
| 4) Was the following information documented?                                                               |  |                                 |                                              |                   |                                                 |                                  |                      | <b>Circle as appropriate</b>    |       |
| a) Risk assessment as per NPSA advice?                                                                     |  |                                 |                                              |                   |                                                 |                                  |                      | Yes                             | No    |
| b) Nostril in which the tube was inserted into                                                             |  |                                 |                                              |                   |                                                 |                                  |                      | Yes                             | No    |
| c) Length of tube                                                                                          |  |                                 |                                              |                   |                                                 |                                  |                      | Yes                             | No    |
| d) Date and time (if provided, record time here: .....                                                     |  |                                 |                                              |                   |                                                 |                                  |                      | Yes                             | No    |
| e) Entry signed appropriately (i.e., in line with GMC guidance)                                            |  |                                 |                                              |                   |                                                 |                                  |                      | Yes                             | No    |
| 5) Who inserted tube? (circle <b>one</b> as appropriate)                                                   |  |                                 |                                              |                   |                                                 |                                  |                      |                                 |       |
| Doctor (specify grade):<br>.....                                                                           |  |                                 | Nurse (specify grade):<br>.....              |                   |                                                 | Other (please specify):<br>..... |                      | Not documented                  |       |
| SECTION 2: Confirming tube position                                                                        |  |                                 |                                              |                   |                                                 |                                  |                      |                                 |       |
| 6) What was the <b>first line test method</b> to confirm position? (circle <b>one</b> as appropriate)      |  |                                 |                                              |                   |                                                 |                                  |                      |                                 |       |
| pH paper                                                                                                   |  |                                 | X-ray*                                       |                   | N/A (i.e., placed in radiology)*                |                                  |                      | Not documented                  |       |
| *If pH paper method <b>was not used</b> as the first line test method, what was the reason given?<br>..... |  |                                 |                                              |                   |                                                 |                                  |                      |                                 |       |
| 7) If pH paper method <b>was used</b> , what was the outcome? (circle <b>one</b> as appropriate)           |  |                                 |                                              |                   |                                                 |                                  |                      |                                 |       |
| Successfully confirmed pH < 5.5                                                                            |  |                                 | Failed/unable to aspirate                    |                   | pH indeterminate                                |                                  | Other (specify)..... |                                 |       |
| 8) Was the patient sent for an X-ray? (*if no, please go to Section 3: Maintenance of tube)                |  |                                 |                                              |                   |                                                 |                                  |                      | Yes                             | *No   |
| 9) Was the purpose of the X-ray clearly documented on the request card?                                    |  |                                 |                                              |                   |                                                 |                                  |                      | Yes                             | No ND |
| 10) Was the following documented? (circle <b>all</b> that are appropriate)                                 |  |                                 |                                              |                   |                                                 |                                  |                      |                                 |       |
| X-ray result                                                                                               |  | Time and date of X-ray reviewed |                                              |                   | Confirms correct patient and most current X-ray |                                  |                      | Plan (i.e., safe to feed, etc.) |       |
| 10) Was quality of the X-ray sufficient to determine tube location? (*if 'No' please circle reason below)  |  |                                 |                                              |                   |                                                 |                                  |                      | Yes                             | No*   |
| Over/underexposed                                                                                          |  |                                 | Patient rotated                              |                   |                                                 | Tip of tube missing off X-ray    |                      |                                 |       |
| 11) Was the position of the tube correct?                                                                  |  |                                 |                                              |                   |                                                 |                                  |                      | Yes                             | No    |
| SECTION 3: Maintenance of tube                                                                             |  |                                 |                                              |                   |                                                 |                                  |                      |                                 |       |
| 12) Was the NG tube position confirmed before each use (or at least once daily if continuous feeds)?       |  |                                 |                                              |                   |                                                 |                                  |                      | Yes                             | No    |
|                                                                                                            |  |                                 |                                              |                   |                                                 |                                  |                      | Not documented                  |       |
| 13) Please state the length of time patient was treated using NG tubes .....                               |  |                                 |                                              |                   |                                                 |                                  |                      | Not documented                  |       |
| 14) How many times was the tube replaced? .....                                                            |  |                                 |                                              |                   |                                                 |                                  |                      | Not documented                  |       |
| 15) Was care pathway/bedside documentation complete? (*Please state what was missing):<br>.....            |  |                                 |                                              |                   |                                                 |                                  |                      | Yes                             | No*   |
| 16) Any evidence that the patient suffered an adverse event as a result of the NG tube?<br>.....           |  |                                 |                                              |                   |                                                 |                                  |                      | Yes                             | No    |
| 17) If patient now deceased, what was cause of death?<br>.....                                             |  |                                 |                                              |                   |                                                 |                                  |                      |                                 |       |
| General comments about the notes you have seen (either positive/negative):<br>.....                        |  |                                 |                                              |                   |                                                 |                                  |                      |                                 |       |
