# Supplementary material for: Collaborating with front-line healthcare professionals: the clinical and cost effectiveness of a theory based approach to the implementation of a national guideline
Source: BMC Health Serv Res. 2014 Dec 21;14:648. doi: 10.1186/s12913-014-0648-4 (PMC4301624; doi:10.1186/s12913-014-0648-4)
Supplement: Additional file 4: — ROI base case and sensitivity analyses. Return on investment base case and sensitivity analysis for year 1, and years 1&2, 1–3, 1–4, and 1–5. [file 12913_2014_648_MOESM4_ESM.pdf]

#### Additional File 4. ROI base case and sensitivity analyses

| Analyses             | Year 1 | Years 1 & 2 | Years 1 to 3 | Years 1 to 4 | Years 1 to 5 |
|----------------------|--------|-------------|--------------|--------------|--------------|
| Base case            | 82%    | 172%        | 204%         | 242%         | 269%         |
| 20% increase costs   | 52%    | 126%        | 153%         | 185%         | 208%         |
| 20% decrease costs   | 128%   | 240%        | 280%         | 328%         | 361%         |
| 20% increase savings | 119%   | 226%        | 265%         | 310%         | 343%         |
| 20% decrease savings | 46%    | 117%        | 143%         | 174%         | 195%         |
