# Supplementary material for: Collaborating with front-line healthcare professionals: the clinical and cost effectiveness of a theory based approach to the implementation of a national guideline
Source: Springer Nature journal article supplement (doi:10.1186/s12913-014-0648-4), 2014-12-01
Supplement: MOESM2 [file 9756882]

Additional File 2

Table 3.1. Zou's modified Poisson regression model coefficients estimating the risk ratios of the use of pH testing assuming no change in the control hospital

| First Line method | Hospital     | Pre intervention (%) | Post intervention (%)     | Pre-intervention model coefficients with respect to the control hospital<br>Risk Ratio (95% CI) | p-value for model coefficients with respect to the control hospital | Post-intervention model coefficients with respect to the changes in risk in the control hospital<br>Risk Ratio (95% CI) | p-value for model coefficients with respect to the control hospital |
|-------------------|--------------|----------------------|---------------------------|-------------------------------------------------------------------------------------------------|---------------------------------------------------------------------|-------------------------------------------------------------------------------------------------------------------------|---------------------------------------------------------------------|
| pH                | H1           | 9/49 (18.4)          | 30/48 (62.5)              | 0.41 (0.21 to 0.79)                                                                             | 0.007                                                               | 3.38 (1.57 to 7.25)                                                                                                     | 0.002                                                               |
|                   | H2           | 5/43 (11.6)          | 32/44 (72.7)              | 0.26 (0.11 to 0.62)                                                                             | 0.002                                                               | 6.20 (2.40 to 16.03)                                                                                                    | < 0.001                                                             |
|                   | H3           | 6/44 (13.6)          | 13/40 (32.5)              | 0.30 (0.14 to 0.67)                                                                             | 0.003                                                               | 2.36 (0.90 to 6.23)                                                                                                     | 0.082                                                               |
|                   | H4 (control) | 24/53 (45.3)         | 21/46 (45.7) <sup>#</sup> | Reference                                                                                       |                                                                     | 1                                                                                                                       |                                                                     |

<sup>#</sup>: Adjusted to ensure there is no change from pre to post in the control hospital

NB: Results remain in the same direction but Hospital 3 no longer significant at 5% but is significant at 10%.
