# Supplementary material for: Collaborating with front-line healthcare professionals: the clinical and cost effectiveness of a theory based approach to the implementation of a national guideline
Source: Springer Nature journal article supplement (doi:10.1186/s12913-014-0648-4), 2014-12-01
Supplement: MOESM3 [file 9756882]

Additional File 3. Activities and cost per hospital

| Activity                     | Cost       | Driver                                                                                                                                                        |
|------------------------------|------------|---------------------------------------------------------------------------------------------------------------------------------------------------------------|
| Audit                        | £7,266     | 100 people per audit pre and post, 15 minutes to retrieve data (band 5); process and present 4 weeks effort (band 7)                                          |
| Materials                    | £237       | DVD, poster and screen saver developed for region and each hospital shares costs                                                                              |
| Senior management support    | £1,127     | 5% of local team                                                                                                                                              |
| Local team                   | £22,545    | Three teams per hospital each comprising 1 radiographer; 1 consultant; 1 registrar; 1 nurse, 1 improvement lead. Each team devote 3 hours a week for 10 weeks |
| Project team                 | £1,179     | One (band 7) Improvement Lead for 4 days                                                                                                                      |
| Time for training            | £13,470    | Training time 30 minutes per staff member: 621 staff per hospital receive this level of support.                                                              |
| Total                        | £45,824    |                                                                                                                                                               |
| Total cost with 34 hospitals | £1,558,016 |                                                                                                                                                               |
